# Supplementary material
Source: PubMed Central journal article supplement (PMC5031552)
Supplement: NIHMS794305-supplement-01.pdf [file NIHMS794305-supplement-01.pdf]

## Supplementary Figure 1

**A**

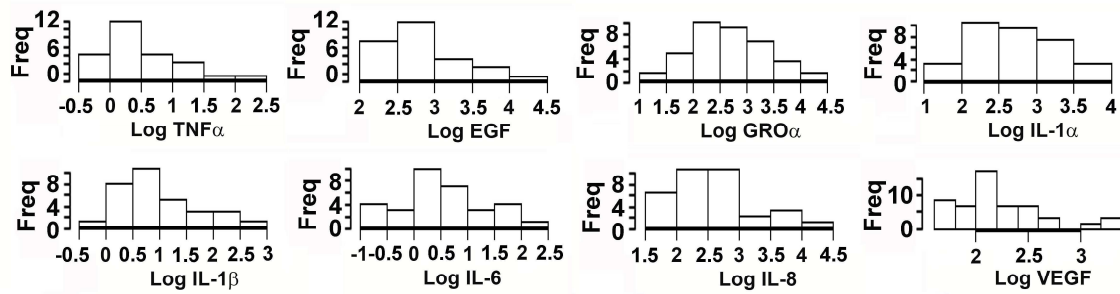

**B**

| Cytokine     | PreTreatment   |              | PostTreatment   |               |
|--------------|----------------|--------------|-----------------|---------------|
|              | Mean (std)     | Range        | Mean (std)      | Range         |
| TNF $\alpha$ | 2.51 (2.67)    | 0.7-11.7     | 16.69 (37.72)   | 0.6-153.3     |
| EGF          | 747.6 (1082.5) | 139.4-4583.3 | 2010.0 (3045.5) | 209.3-10794.4 |
| Gro $\alpha$ | 312.8 (425.9)  | 27.3-1515.8  | 2641.4 (3949.3) | 158.7-14666.7 |
| IL1 $\alpha$ | 476.5 (578.7)  | 93.3-2030.0  | 2152.1 (2822.2) | 96.3-8336.7   |
| IL1 $\beta$  | 17.2 (37.4)    | 0.7-150.4    | 95.2 (226.1)    | 1.4-909.3     |
| IL6          | 9.01 (27.4)    | 0.2-111.3    | 16.4 (22.1)     | 0.3-76.7      |
| IL8          | 274.9 (255.9)  | 37.9-884.1   | 2371.0 (3405.6) | 90.0-12298.7  |
| VEGF         | 154.5 (141.9)  | 39.8-586.7   | 434.4 (544.8)   | 48.6-1703.3   |

Values on raw scale (not log-transformed) (ng/ $\mu$ l)

**Supplementary Figure 1. Cytokine expression in whole stimulated saliva.** A) Distribution of cytokine secretion after log transformation. B) Mean, standard deviation, median, and range of cytokine secretion pre- and post-treatment.
